1 **Running Title:** Epigenetic repression of the SHATTERPROOF 1 gene is  
2 associated with pod shatter resistance

3

4 **An Epigenetic LTR-retrotransposon insertion in the upstream**  
5 **region of *BnSHP1.A9* controls quantitative pod shattering**  
6 **resistance in *Brassica napus***

7

8 **Authors:** Jia Liu<sup>1\*</sup>, Rijin Zhou<sup>1\*</sup>, Wenxiang Wang<sup>1</sup>, Hui Wang<sup>1</sup>, Yu Qiu<sup>2</sup>,  
9 Raman Rosy<sup>2</sup>, Desheng Mei<sup>1</sup>, Raman Harsh<sup>2</sup>, Qiong Hu<sup>1†</sup>

10

11 **Affiliations:**

12 <sup>1</sup>Oil Crops Research Institute, Chinese Academy of Agricultural Sciences,  
13 No.2 Xudong 2nd RD, 430062 Wuhan Hubei, P.R. China

14

15 <sup>2</sup>NSW Department of Primary Industries, Wagga Wagga Agricultural Institute,  
16 PMB, Wagga Wagga, NSW 2650, Australia

17

18

19

20

21

22

23

24 **Email addresses:**

25 Jia Liu: liujia02@caas.cn

26 Rijin Zhou: weiming3130@163.com

27 Wenxiang Wang: wangwenxiang@caas.cn

28 Hui Wang: wanghui06@caas.cn

29 Rosy Raman: rosy.raman@dpi.nsw.gov.au

30 Yu Qiu: yqiu@csu.edu.au

31 Desheng Mei: meidesheng@caas.cn

32 Harsh Raman: harsh.raman@dpi.nsw.gov.au

33 Qiong Hu: huqiong01@caas.cn

34

35 **Manuscript with 2 tables , 7 figures, 8 supplemental tables and 1**

36 **supplemental figure**

37

38 \*These authors contributed equally to this work.

39

40 †Correspondence:

41 Prof. Qiong Hu

42 Email: huqiong01@caas.cn

43 Tel: +86 027 86711556

44

45

46

47

48

49

50

51

52

53 **Abstract**

54 Seed loss resulting from pod shattering is a major problem in oilseed rape  
55 (*Brassica napus* L.) production worldwide. However, the molecular  
56 mechanisms underlying pod shatter resistance are not well understood. Here  
57 we show that the pod shatter resistance at quantitative trait locus, qSRI.A9.1  
58 is controlled by a *SHATTERPROOF1* (*SHP1*) paralog in *B. napus*  
59 (*BnSHP1.A9*). Expression analysis by quantitative RT-PCR showed that  
60 *BnSHP1.A9* was specifically expressed in flower buds, flowers and  
61 developing siliques in the oilseed rape line (R1) carrying the qSRI.A9.1 allele  
62 with negative effect, but not expressed in any tissue of the line (R2) carrying  
63 the positive effect qSRI.A9.1 allele. Transgenic plants constitutively  
64 expressing *BnSHP1.A9* alleles from pod resistant and pod shattering  
65 parental lines showed that both alleles are responsible for pod shattering via  
66 promoting lignification of *enb* layer, which indicated allelic difference of  
67 *BnSHP1.A9* gene *per se* is not the causal factor of the QTL. The upstream  
68 sequence of *BnSHP1.A9* in the promotor region harboring highly methylated  
69 long terminal repeat retrotransposon insertion (LTR, 4803bp) in R2  
70 repressed the expression of *BnSHP.A9*, and thus contributed to the positive  
71 effect on pod shatter resistance. Genetic and association analysis revealed  
72 that the *copia* LTR retrotransposon based marker *BnSHP1.A9*<sub>R2</sub> can be  
73 used for breeding for pod shatter resistant varieties and reducing the loss of  
74 seed yield in oilseed rape.

75

76

77 **Keywords:** Oilseed rape, pod shattering, genetic analysis, natural  
78 variation, LTR-retrotransposon, gene expression

79

80

## 81 Introduction

82 Oilseed rape (*Brassica napus* L.) is not only a major source of edible  
83 vegetable oil for human consumption, but also provides an important energy  
84 resource for stock-feed and biodiesel production. Upon maturity, siliques  
85 (pods) of oilseed rape open, dehiscing seed and causing significant yield  
86 loss; particularly if oilseed is harvested after the full maturity (BBCH scale 95).  
87 Pod shattering usually accounts for an approximately 10% yield loss on an  
88 average, however in certain environments it can cause yield loss up to 50%  
89 (Kadkol et al., 1984; Wang et al., 2007). In order to reduce such loss, oilseed  
90 rape is either harvested manually or mechanically before full maturation of  
91 seeds (windrowing). Premature harvest can reduce yield loss, but immature  
92 seed can lead to lower oil content (Østergaard et al., 2006) and higher  
93 chlorophyll content. In recent years, due to the shortage and high cost of  
94 labour, broad-acre cropping of oilseed rape has been preferentially combine  
95 harvested by farmers. Varieties with improved pod shatter resistance,  
96 amenable for mechanical harvesting provide a cost-effective solution for  
97 commercial oilseed rape production worldwide.

98 Genetic variation for pod shatter resistance exists in *Brassica napus*,  
99 *Brassica rapa*, *Brassica juncea* and *Brassica carinata* germplasm (Hu et al.,  
100 2012; Liu et al., 2016; Raman et al., 2014; Raman et al., 2017; Kadkol et al.,  
101 1984), and can be exploited to breed commercial varieties with improved pod  
102 shatter resistance. Genetic studies have revealed that pod shatter resistance

103 is controlled by multiple genes. Several quantitative trait loci (QTL)  
104 associated with this trait have been localized on genetic and physical maps  
105 of oilseed rape (Hu et al., 2012; Raman et al., 2014; Liu et al., 2016).  
106 However, the identification of corresponding genes underlying QTL for pod  
107 shatter resistance in *B. napus* has not been reported yet.

108 In the model plant *Arabidopsis thaliana*, which belongs to the same  
109 Brassicaceae family as oilseed rape, gene network involved in pod  
110 development and dehiscence has been elucidated (Liljegren et al., 2004).  
111 For example, MADS-box transcription factors *SHATTERPROOF1* (*SHP1*)  
112 and *SHATTERPROOF2* (*SHP2*) (Liljegren et al., 2000), basic helix-loop-helix  
113 (bHLH) gene *INDEHISCENT* (*IND*) (Liljegren et al., 2004), and *ALCATRAZ*  
114 (*ALC*) (Rajani and Sundaresan, 2001) regulate the differentiation of the  
115 dehiscence zone. The activity of valve margin identity genes is repressed by  
116 *FRUITFULL* (*FUL*) in the valves (Gu et al., 1998), and *REPLUMLESS* (*RPL*)  
117 in the replum (Roeder et al., 2003). Several phytohormones such as auxin,  
118 cytokinin and gibberellin are also essential for pod development and the  
119 expression of valve margin identity and *IND* genes (Larsson et al., 2014;  
120 Simonini et al., 2017; Arnaud et al., 2010; Zuniga-Mayo et al., 2014). Braatz  
121 et al (2018a and 2018b) have shown that induced mutations in *IND* and *ALC*  
122 homologues are linked with pod shatter resistance in oilseed rape. Ectopic  
123 expression of *FUL* gene from *Arabidopsis* has been shown to result in pod  
124 shatter resistance via inhibiting *SHP* expression in *B. juncea* (Ostergaard et

125 al., 2006). However for commercial production of 'conventional' oilseed rape,  
126 a fine tuning of these genes is required to develop a desirable level of  
127 dehiscence.

128 Comparative mapping studies have shown that the *SHATTERPROOF*  
129 paralogs of *A. thaliana* (*SHP1* and *SHP2*) are located in the vicinity of the  
130 QTL associated with pod shatter resistance on chromosome A9 (designated  
131 as *BnSHP1.A9* and *BnSHP2.A9*) in Australian and Chinese oilseed rape  
132 populations, including the R1/R2 DH population utilized in this study (Liu et  
133 al., 2016; Raman et al., 2014). *SHP1* and *SHP2* are MADS-box genes,  
134 which regulate cell differentiation of the valve margin and promote  
135 lignification (Liljegren et al., 2000). Both genes are highly homologous and  
136 functionally redundant.

137 In the present study, we cloned the *BnSHP1.A9* gene underlying the  
138 resistant QTL qSRI.A9.1 for pod shatter resistance and characterized its  
139 functional role by employing comparative expression analysis using  
140 quantitative RT-PCR, anatomical and transgenic approaches. Our findings  
141 suggested that the LTR retroelement insertion silences the expression of  
142 *BnSHP1.A9* epigenetically via DNA methylation, and contributes to the pod  
143 shatter resistance in oilseed rape.

## 144 **Materials and Methods**

### 145 **Plant materials and evaluation of resistance to pod shattering**

146 For genetic analysis we used parental lines, R1 (pod shatter resistant), R2  
147 (pod shatter prone) and a mapping population comprising of 96 DH lines that  
148 showed segregation for pod shatter resistance, developed from a cross  
149 between R1 and R2 (Liu et al., 2013). In addition, we used a total of 135  
150 diverse accessions, comprised of four winter type, 119 semi-winter type and  
151 12 spring type (Supplemental table 1) to validate the association between  
152 pod shatter resistance index (PSRI) and the *BnSHP1.A9* promoter specific  
153 marker. All accessions were evaluated for pod shatter resistance using  
154 random impact test as described previously (Liu et al., 2016).

#### 155 **Sequence analysis of *BnSHP1.A9***

156 Total DNA was extracted from the leaves of 4 weeks old seedlings by CTAB  
157 method (Stein et al., 2001). The reference sequence of *BnSHP1.A9*  
158 (BnaA09g55330D) from the *B. napus* cv. Darmor genome  
159 ([www.genoscope.cns.fr/brassicnapus](http://www.genoscope.cns.fr/brassicnapus)) was used as a template to design  
160 specific primer pairs (Table1) for cloning the genomic sequence and open  
161 reading frame of *BnSHP1.A9*. DNA amplification was performed in a 20  $\mu$ l  
162 reaction system comprising 2  $\mu$ l (10  $\mu$ M) of forward and reverse primers, 4  $\mu$ l  
163 5x TransStart<sup>®</sup>FastPfu Fly buffer, 2  $\mu$ l 2.5mM dNTPs, 2  $\mu$ l 5x PCR stimulant,  
164 0.4  $\mu$ l 50mM MgSO<sub>4</sub>, 1 U TransStart<sup>®</sup> FastPfu Fly DNA Polymerase (Beijing  
165 TransGen Biotech Co., Ltd., Product Code: AP231), and 20-30 ng template  
166 DNA. After initial denaturation of template DNA at 95 °C for 3 min, PCR was



167 carried out following 34 cycles of 20 seconds at 94 °C , 30 seconds at about 5  
168 °C lower than melting temperature of the primer pair used, 1 min/kb at 72 °C  
169 with a final extension of 5 min at 72 °C. The PCR products were separated by  
170 electrophoresis in 0.8% low melting agarose gels, the target bands were  
171 purified, cloned into the pEASY-Blunt Zero cloning vector (Beijing TransGen  
172 Biotech Co. Ltd., Product Code: CB501-02) and then transformed into *Trans1-*  
173 T1 competent *E. coli* cells by the heat shock method (Beijing TransGen  
174 Biotech Co. Ltd., Product Code: CB501, CT101). Four to six positive clones  
175 were randomly selected and sequenced with M13 sequencing primers at  
176 Shanghai Sangon Biotech Co. Ltd (<http://www.sangon.com/>). Sequences were  
177 then analyzed by MultAlin online software (Corpet, 1988). To determine the  
178 physical location and sequence similarities of *BnSHP1.A9* clones, the  
179 BLASTn was used against the Darmor reference sequence  
180 (<http://www.genoscope.cns.fr/brassicnapus/>). To clone the upstream  
181 sequence of *BnSHP1.A9*, we developed two specific primer pairs for R1  
182 (BnSHP1.A9p1) and R2 (BnSHP1.A9p2) that are listed in Table 2.

### 183 **Development and assay of *BnSHP1.A9*-specific marker**

184 The genomic sequences of *BnSHP1.A9* from R1 and R2 were aligned in  
185 MEGA7 (Kumar et al., 2016) using both the reference genomic and coding  
186 sequences (BnaA09g55330D) of Darmor-*bzh*. Based on the sequence  
187 differences we developed a co-dominant Indel marker (*BnSHP1.A9-IF4*)

188 targeting the indel difference of the first intron of *BnSHP1.A9* between the  
189 parental lines of the R1/R2 population for genetic mapping and the allelic  
190 diversity analysis (Table 1). PCR was performed in a volume of 10  $\mu$ l system,  
191 including 5  $\mu$ l 2 $\times$ Taq MasterMix, 1  $\mu$ l (10  $\mu$ M) of each primer, 2  $\mu$ l ddH<sub>2</sub>O, 1  $\mu$ l  
192 genomic DNA (20-30 ng). The PCR condition used was as following: 3 min at  
193 94 °C, 35 cycles of 30 s at 94 °C, 30 s at 57 °C, 30 s at 72 °C, with a final  
194 extension of 5 min at 72 °C. The PCR products were examined on either 3%  
195 agarose gel by electrophoresis at 130 V for 1 hour or using capillary  
196 electrophoresis on an automated CEQ2000 system (Beckman-Coulter) as  
197 described previously (Raman et al., 2005). The gels were stained with Syber-  
198 green and visualized under UV light. The PCR yielded a 267-bp product from  
199 R1 (pod shatter resistance allele) and a 290-bp product from R2 (pod shatter  
200 prone allele).

## 201 **QTL mapping**

202 The 96 DH lines derived from R1/R2 cross were genotyped with an InDel  
203 marker *BnSHP1.A9-IF4* and other new InDel and SSR makers developed  
204 based on sequence variation between the two parental lines in the vicinity of  
205 qSRI.A9 region (Supplemental table 2). This polymorphic data was integrated  
206 with the Illumina Brassica 60K Infinium ® SNP array and pod shatter  
207 resistance data generated in our previous study (Liu et al., 2016). To  
208 determine putative QTL for pod shatter resistance, we performed the

209 composite interval mapping (CIM) using WinQTL Cartographer 2.50 (Zeng,  
210 1994; Wang et al., 2006). The genome scan was performed at every 2 cM to  
211 estimate the likelihood of a QTL and its corresponding phenotypic effect ( $R^2$ ).  
212 The empirical threshold was computed using 1,000 permutations (overall error  
213 level 5%) as described in Churchill and Doerge (1994).

#### 214 **Analysis of *BnSHP1.A9* transcript levels**

215 To detect the dynamic expression patterns of the *BnSHP1.A9* gene, tissues  
216 of root, stem and young leaf were collected from 4 weeks old plants, while  
217 bud, fully-open flower, and developing pods were collected at 10, 20, 30 and  
218 40 days after flowering (DAF) from R1 and R2 parental and DH lines (DH56  
219 and DH82), and snap frozen in liquid nitrogen. For each sample, including  
220 pods at different developmental stages, three biological replicates were used  
221 for semi-quantitative reverse transcription PCR (RT-PCR). Total RNA was  
222 extracted using the RNAPrep Pure Plant Kit (TIANGEN Biotech Beijing Co.,  
223 Ltd. Product code: DP432). DNase I-treated RNA was reverse transcribed  
224 using the cDNA synthesizing kit following the manufacturer's instructions  
225 (TIANGEN Biotech Beijing Co., Ltd. Product code: KR106-02). To eliminate  
226 interference from other paralogues, an allele-specific primer pair  
227 *BnSHP1.A9*-RT (F/R) was designed (Supplemental table 3) and the  
228 specificity was validated by PCR product sequencing. The *actin* gene was

229 used as an internal control for semi-quantification of relative expression  
230 values.

### 231 **DNA methylation analysis**

232 McrBC endonuclease (NEB, M0272S) was firstly employed to analyze the  
233 DNA methylation status of *BnSHP1.A9* promoter region and genic region. 0.5  
234 µg genomic DNA extracted from 20 DAF siliques of R1 and R2 was digested  
235 respectively with 5 U McrBC overnight at 37 °C, the methylated plasmid DNA  
236 in the product was used as positive control. The McrBC-digested DNA was  
237 then used as template to amplify *BnSHP1.A9* promoter and genic region with  
238 allele specific primer pairs (Supplemental table 4). The Chop PCR products  
239 were then checked by agarose gel electrophoresis and stained with Syber-  
240 green and visualized under UV light.

241 Detailed analysis of promoter DNA methylation was then performed with  
242 bisulfite sequencing method (Gruntman et al., 2008). Genomic DNA of R1  
243 and R2 from 20 DAF siliques was bisulfite treated using EpiTect Bisulfite Kit  
244 (Qiagen 59104) following the instructions of manufacturer. Bisulfite  
245 sequencing primers were designed with MethPrimer online tool  
246 (<http://www.urogene.org/cgi-bin/methprimer/methprimer.cgi>) and primer  
247 designing tool in NCBI. The bisulfate-treated DNA was used as template to  
248 amplify the target fragments of R1/R2 promoter with specific bisulfite primers  
249 (Supplemental table 5) and the resulting PCR fragments were cloned into  
250 pTOPO-T simple vector (Aidlab CV1501). At least 24 positive clones were

251 sequenced from each fragment. Vector sequences together with primer  
252 sequences of sequencing results were first trimmed out and the remaining  
253 sequences were then blasted against *Brassica napus* reference genome  
254 database (<http://www.genoscope.cns.fr/brassicnapus/>) to confirm the  
255 specificity. The methylation status of the specifically amplified fragments was  
256 then analyzed by Kismeth online tool  
257 (<http://katahdin.mssm.edu/kismeth/revpage.pl>). The data of methylated  
258 cytosines (CG, CHG and CHH) between the two parental lines were collected  
259 and compared by t-test.

#### 260 **Generation and analysis of transgenic lines overexpressing *BnSHP1.A9***

261 To examine the function of different *BnSHP1.A9* alleles from R1 and R2  
262 parental lines, two overexpression vectors driven by CAMV35S promoter,  
263 *35S::BnSHP1.A9<sub>R1</sub>* and *35S::BnSHP1.A9<sub>R2</sub>*, were constructed by cloning  
264 *BnSHP1.A9* coding sequence from R1 and R2 into the pCAMBIA-1301  
265 vector using *Nco* I-*Bst* E II cloning sites. *BnSHP1.A9* cDNA was amplified  
266 from developing pods using primer pair *BnSHP1.A9orf* (Table 2). The two  
267 overexpression vectors were then transformed into *Agrobacterium*  
268 *tumefaciens* GV3101 strain individually and then used for transformation of  
269 the *B. napus* line R1 (resistant to pod shatter) by *A. tumefaciens* mediated  
270 method (Hood et al., 1993). Transgenic T0 and T1 plants were confirmed by  
271 PCR detection of hygromycin resistance gene with primer pair *HptII-F/R*

272 (Supplemental table 6). The expression level of *BnSHP1.A9* in transgenic  
273 plants was evaluated by RT-PCR. Since CAMV35S promoter could drive  
274 constitutive expression of downstream target genes in all tissues of  
275 transgenic plant, for the convenience of RNA extraction and early detection,  
276 we used leaf tissue for determining the expression level of *BnSHP1.A9* in  
277 transgenic plant. Transgenic lines of the T1 generation derived from both  
278 constructs were evaluated for pod shatter resistance using the random  
279 impact test as described previously (Liu et al., 2016).

## 280 **Results**

### 281 **Sequence variation of *BnSHP1.A9* underlying pod shatter resistance**

282 We isolated the full length of *BnSHP1.A9* gene from both the R1 and R2  
283 parental lines of the DH mapping population. The size of *BnSHP1.A9* genomic  
284 sequences varied from 2,737 bp in R1 to 2,757 bp in R2, with 7 exons and 6  
285 introns (Figure 1C). Sequence alignments revealed polymorphisms in the form  
286 of SNPs and InDel between the two parental lines. There were 9 SNPs in the  
287 exon sequences, including 2 nonsynonymous SNPs in exon1 at # 25 (T/G)  
288 and # 203 (G/T), leading to tyrosine (Y) to aspartic acid (D) and arginine (R)  
289 to leucine (L) amino acid variation, respectively. The point mutation in exon 3 (  
290 # 1751,T/C) causes Y to H (histidine) amino acid alteration, while A/T  
291 mutation at # 2480 in exon 6 leads to D to valine (V) amino acid change  
292 (Supplemental table 7). However, the most abundant sequence divergence

293 was found in the first intron including 21 SNPs and 10 InDels between R1 and  
294 R2, which enabled us to develop a gene specific marker for *BnSHP1.A9*.  
295 In order to determine whether the polymorphism in *BnSHP1.A9* is associated  
296 with pod shatter resistance in a DH population derived from R1 and R2, we  
297 developed a primer pair (IF4) for specific amplification of *BnSHP1.A9* alleles  
298 (Table 1). IF4 amplified a 267-bp fragment from R1 and a 290-bp fragment  
299 from R2. Genotypic analysis of all the 96 DH lines showed a segregation for a  
300 single locus, with 35 lines containing the R1 allele and 55 lines containing the  
301 R2 allele ( $\chi^2 = 4.44$ ,  $P = 0.035$ ) (Supplemental table 8). These marker data  
302 were integrated with previously obtained SNP data from the R1/R2 DH  
303 population (Liu et al., 2016). QTL analysis identified two genomic regions,  
304 *qSRI.A9.1* and *qSRI.A9.2* for pod shattering resistance on chromosome A9,  
305 explaining 11.26% - 12.07% and 27.58% - 38.11% phenotypic variation,  
306 respectively (Figure 1A; Table 2). At *qSRI.A9.1*, the R2 allele contributed a  
307 positive effect to pod shatter resistance, whereas the R1 allele contributed a  
308 negative effect. In contrast, at *qSRI.A9.2*, the R1 allele contributed a positive  
309 effect to pod shatter resistance, whereas the R2 allele contributed a negative  
310 effect. Linkage analysis revealed the order of markers to be ni113 –  
311 *BnSHP1.A9* – BrEMS4; the *BnSHP1.A9* gene was mapped within the  
312 *qSRI.A9.1* genomic region for pod shatter resistance (Table 2, Figure 1A, B).

313 **A LTR retrotransposon is inserted in *BnSHP1.A9* promoter of R2**

314 To gain an understanding on promoter region of the two *BnSHP1.A9* alleles,  
315 we sequenced and analyzed the upstream region of *BnSHP1.A9* from both  
316 parental lines of the mapping population. We identified a 4,803 bp long  
317 terminal repeat (LTR)/copia retrotransposon insertion at 252 bp upstream the  
318 start codon of *BnSHP1.A9* in R2 in opposite orientation (Figure 1C). This  
319 LTR retrotransposon contains the typical retro-transposable element  
320 structure, including a predicted 4,356 bp single open reading frame with  
321 conserved *gag*, *prot*, *int*, *RT* and *RNaseH* domains, two identical 169 bp 5'  
322 and 3' LTRs flanked by 5 bp direct repeat sequence (5'-GAGGT-3') (Cao et  
323 al., 2015). Sequence alignment of this LTR retrotransposon against the NCBI  
324 database revealed 100% sequence identity with a *B. rapa* A9 scaffold  
325 (LR031568.1), which suggested this LTR retrotransposon insertion may have  
326 been originated from *B. rapa* in R2 paternal line of R1R2 DH mapping  
327 population.

328 **Overexpression of *BnSHP1.A9* alleles promoted pod shattering in pod**  
329 **shatter resistant 'R1' line**

330 Sequence analysis of *BnSHP1.A9* revealed 4 nonsynonymous SNPs in the  
331 coding sequence of *BnSHP1.A9* alleles of the two parental lines and three of  
332 them are located in the predicted conserved MADS-box and K-box domains.  
333 To verify whether these SNPs have any 'phenotypic' effect on gene function,  
334 we overexpressed *BnSHP1.A9* coding sequence (CDS) under the control of



335 constitutive promoter from either R1 or R2 in pod shatter resistant R1  
336 background respectively (named *BnSHP1.A9<sub>R1</sub>* and *BnSHP1.A9<sub>R2</sub>* hereafter).  
337 A total of 71 transgenic plants were generated and subsequently assessed for  
338 pod shatter resistance index by RIT. The PSRI of the transgenic T1 plants  
339 varied from 0.35-0.53, in comparison with the 'wild-type (untransformed)' R1  
340 plants, which averaged 0.83 (n = 8). However, no statistically significant  
341 difference was found for PSRI between the transgenic *BnSHP1.A9<sub>R1</sub>* and  
342 *BnSHP1.A9<sub>R2</sub>* overexpression lines (OE). For example, four OE lines T18,  
343 T24, T26 and T33 of *BnSHP1.A9<sub>R1</sub>* had similar PSRI as that of the T9 line of  
344 *BnSHP1.A9<sub>R2</sub>* (Figure 2).

345 Expression of *BnSHP1.A9* in developing pods in 15 selected transgenic T1  
346 plants (three from each T1 line) were examined using semi-quantitative RT-  
347 PCR. All the tested T1 plants exhibited elevated level of *BnSHP1.A9*  
348 expression (Supplemental figure 1). These results proved that both alleles of  
349 *BnSHP1.A9* gene (R1 and R2) are functional in promoting pod shattering in *B.*  
350 *napus*. To explore whether overexpression of *BnSHP1.A9* causes dehiscence  
351 zone differentiation in siliques, we analyzed pod anatomical structure of  
352 *BnSHP1.A9<sub>R1</sub>* and *BnSHP1.A9<sub>R2</sub>* OE lines as described in Raman et al.  
353 (2017). A more compact arrangement of the 'enb' layer at the valve margin  
354 was observed in pod cross sections of the *BnSHP1.A9<sub>R1</sub>* and *BnSHP1.A9<sub>R2</sub>*  
355 OE T1 lines than in the wild type (Figure 3). Our results indicate that  
356 *BnSHP1.A9* gene promotes pod shattering through the increase of the

357 number of lignified cells in the 'enb' layer , thus enhancing tension caused by  
358 differential contraction of the fruit wall tissue in oilseed rape.

### 359 **Expression of *BnSHP1.A9* is repressed in R2**

360 To test the dynamic expression of *BnSHP1.A9*, we investigated its  
361 expression pattern in root, stem, leaf, bud, flower, and developing siliques in  
362 R1 and R2 parental lines of the mapping population. Since there is a highly  
363 homologous copy of *SHP1* on chromosome C08 (BnaC08g29520D), to  
364 eliminate potential nonspecific amplification, we designed a specific RT-PCR  
365 primer pair for *BnSHP1.A9* based on SNPs between coding sequences of  
366 these two homologues. The result showed that *BnSHP1.A9* was expressed  
367 exclusively in bud, flower and developing siliques in R1. In contrast, almost  
368 no expression in either vegetative organs or reproductive organs could be  
369 detected in R2 (Figure 4A).

### 370 **The LTR insertion correlates with *BnSHP1.A9* repression in DH lines**

371 Since the LTR element insertion locates in the upstream of the start codon of  
372 the R2 *BnSHP1.A9* allele, it may play a role in the repression of *BnSHP1.A9*  
373 expression. To further test this hypothesis, we investigated the 96 R1/R2 DH  
374 lines using promoter specific primers of *BnSHP1.A9* and selected two DH  
375 lines (DH56 and DH82 lines) that had the same genotype of *BnSHP1.A9*  
376 allele as R1 and R2, respectively. We then analyzed *BnSHP1.A9* expression  
377 level in 10, 20, 30 DAF siliques of DH56 and DH82 lines by RT-PCR. A weak

378 band was visible in the siliques of all three developing stages of DH56, which  
379 does not contain the LTR insertion (LTR<sup>-</sup>). There was no amplification in any  
380 of the three silique samples in DH82 containing the LTR insertion (LTR<sup>+</sup>)  
381 (Figure 4B). On the basis of these data together with the expression pattern  
382 of *BnSHP1.A9* in the two parental lines, our results suggest that the LTR  
383 insertion in upstream of *BnSHP1.A9* is responsible for repression of  
384 *BnSHP1.A9* transcript.

385 **DNA methylation of LTR retroelement insertion is responsible for the**  
386 **repression of *BnSHP1.A9***

387 To understand the basis of LTR insertion mediated repression of *BnSHP1.A9*,  
388 we performed site-specific chop-PCR and bisulfite sequencing of genomic  
389 DNA extracted from 20 DAF silique of R1 and R2 to analyze DNA  
390 methylation status of the upstream and genomic regions of *BnSHP1.A9*.  
391 Chop-PCR amplified no bands from the LTR insertion fragments (b3, b4, b5  
392 and b6) of R2 (Figure 5C and 5E) because of hypermethylation of the  
393 sequences, whereas same bands were amplified from other fragments of R2  
394 as those from R1 (Figure 5B and 5D). These observations hinted that DNA  
395 methylation mainly occurred in the LTR insertion. The cytosine residues of  
396 LTR inner region were also decayed along far away the central insertion  
397 region.  
398 The bisulfite sequencing results showed that the LTR retrotransposon and

399 the transcription start region of *BnSHP1.A9* in R2 was hypermethylated,  
400 while the promoter region of *BnSHP1.A9* in R1 was hypomethylated (Figure  
401 6B). The methylation level of mF4 region in R2 located at about 1.8 kb  
402 upstream the LTR element and the corresponding region of mF3 in R1 are  
403 much lower than the downstream regions close to the start codon (Fig. 6B  
404 and 6C). In mF1 region, we found the 100% cytosine (C) residues in all sites  
405 of CG and CHH (H represents any residues other than G) were methylated  
406 in R2 because of the LTR insertion, whereas only 7.84% cytosine residues of  
407 the corresponding sites were methylated in R1. The mF2, mF3 and mF4  
408 regions in R1 were hypomethylated from 2.37% to 6.10%. We investigated  
409 the methylation level of mF2 and mF3 of the LTR region in R2. In the mF2  
410 region, 97.49% of cytosine residues was hypermethylated, while only  
411 50.47% of cytosine residues were methylated in mF3 region. Among these  
412 cytosine residue containing sites in mF3 region, cytosine residues of CG  
413 were still hypermethylated, however the methylation of cytosine residues of  
414 CHG and CHH were significantly decreased to 43.85% and 17.53%. For  
415 mF4, the upstream region of about 2 kb away from the LTR and 7 Kb away  
416 from the transcription start codon of *BnSHP1.A9*, the methylation level was  
417 significantly decreased to a normal level of about 6.10% in both lines. Thus,  
418 methylation by the LTR retrotransposon in the vicinity of *BnSHP1.A9*  
419 promoter region in R2 may directly affect in the down-regulation of  
420 *BnSHP1.A9* expression.

421 **The LTR insertion correlates with pod shatter resistance in diverse**  
422 **oilseed rape germplasm**

423 To verify the linkage between this LTR retrotransposon insertion and pod  
424 shatter resistance, we tested 135 diverse accessions with an allele specific  
425 diagnostic marker for LTR detection (*BnSHP1.A9*p1/p2, Table 1). The  
426 homozygous *BnSHP1.A9* (R1) allele (R1 specific, LTR<sup>-</sup>) and homozygous  
427 *BnSHP1.A9* (R2) allele (R2 specific, LTR<sup>+</sup>) were detected in 63.7% (86) and  
428 15.6% (21) accessions, respectively, and heterozygous *BnSHP1.A9* (H) was  
429 found in 11.9% (16) accessions (Supplemental table 1). A significant  
430 association between the *BnSHP1.A9* (R2, LTR<sup>+</sup>) promoter allele and pod  
431 SRI was observed among the tested oilseed rape accessions (Figure 7). The  
432 average pod SRI of the lines with *BnSHP1.A9* (R2, LTR<sup>+</sup>) genotype was  
433 significantly higher than that of lines with *BnSHP1.A9* (R1, LTR<sup>-</sup>), indicating  
434 that *BnSHP1.A9* (R2, LTR<sup>+</sup>) allele could increase PSRI compared to  
435 *BnSHP1.A9* (R1, LTR<sup>-</sup>) allele.

436

437 **Discussion**

438 ***SHATTERPROOF 1* gene, *BnSHP1.A9* underlies pod shatter resistance**

439 In this study, we delineated two QTL; *qSRI.A9.1* and *qSRI.A9.2* with large  
440 allelic effects, on chromosome A9 in a DH population from R1/R2. QTL  
441 accounting for large phenotypic variance of pod shatter resistance have been

442 identified in various *B. napus* populations (Hu et al., 2012; Raman et al., 2014;  
443 Liu et al., 2016). Since a *SHP1* paralog of *A. thaliana* is located in the vicinity  
444 of the significant SNP markers associated with pod shatter resistance on  
445 chromosome A9 (Raman et al., 2014; Liu et al., 2016, this study), we were  
446 interested in determining whether *SHP1* indeed contributes to the genetic  
447 variation for pod shatter resistance in *B. napus* germplasm. Through genetic  
448 analyses (using a DH population from R1/R2 and a set of 135 diverse lines of  
449 oilseed rape breeding germplasm) and functional characterization via  
450 comparative expression analysis and transgenic approaches, we showed that  
451 the *SHP1* paralog, *BnSHP1.A9* underlies pod shatter resistance at *qSRI.A9.1*  
452 in oilseed rape.

453 In this study, we revealed that *BnSHP1.A9* is the functional gene regulating  
454 pod shatter resistance in R1/R2 DH population and in diverse *B. napus* lines.  
455 By overexpressing *BnSHP1.A9* cDNA from both R1 and R2 alleles, an  
456 average of 50% of PSRI decrease was found in T1 lines, thus confirming the  
457 function of *BnSHP1.A9* in pod shatter regulation. This functional analysis  
458 result is in accordance with the expression pattern of *BnSHP1.A9* in the R1  
459 and R2 parental lines. In R2 which contributed positive effect to PSRI on this  
460 locus, the expression of *BnSHP1.A9* was repressed, indicating that the down-  
461 regulation of the target gene enhances PSRI. Overexpression of *BnSHP1.A9*  
462 only partly decreased the pod shatter resistance of R1. This can be attributed  
463 to other loci known to contribute positive effect in R1 for pod shatter

464 resistance, such as the *qSRI.A9.2* as well as other *SHP1* or *SHP2*  
465 homologues which are known to act redundantly and control dehiscence zone  
466 differentiation (Liljegren et al., 2000). Although the expression difference of  
467 *BnSHP1.A9* exists in lines with contrast genetic effects of this locus, the allelic  
468 variation of *BnSHP1.A9 per se* is not the causal factor for the phenotypic  
469 variation of pod shatter resistance, as overexpression of both alleles of the  
470 *BnSHP1.A9* gene facilitated pod shattering in *B. napus*.

471 **LTR retrotransposon insertion in the upstream region regulates**  
472 ***BnSHP1.A9* epigenetically**

473 Comparative and association analyses revealed that the LTR  
474 retrotransposon insertion was significantly associated with pod shatter  
475 resistance among 135 collected accessions, and in R1/R2 DH population.  
476 The *BnSHP1.A9* (R2 allele) promoter region, including LTR retrotransposon  
477 insertion was found to be highly methylated, which is responsible for the  
478 depression of *BnSHP1.A9* expression and the positive effect to pod shatter  
479 resistance phenotype. Transposable elements (TEs) are well known to play  
480 positive roles in generating genomic novelty and diversity in plants (Song et  
481 al., 2017). TEs are frequent found in *B. napus* genomes (Chalhoub et al.,  
482 2014; Sun et al., 2017) and have been implicated in DNA methylation and  
483 H3K9me2 modification (Eichten et al., 2012; Gent et al., 2013), altering gene  
484 expression both genetically and epigenetically (Cui and Cao, 2014). In fact,

485 several oilseed rape genes related to morphological or physiological traits  
486 have evolved from TE insertions (Hou et al., 2012; Zhang et al., 2015; Gao et  
487 al., 2016; Shi et al., 2019). The current study implies that DNA methylation of  
488 the Copia-LTR insertion spreads to *BnSHP1.A9* cis-regulatory region. This  
489 epigenetic modification may change the accessibility of RNA polymerase II  
490 and transcription factors to the *BnSHP1.A9* promoter, and ultimately altering  
491 transcription patterns (Zhao et al., 2013).

492 *B. napus* is an allotetraploid originated from natural hybridization of *B. rapa*  
493 and *Brassica oleracea*. The LTR insertion in *BnSHP1.A9* promoter region  
494 showed 100% sequence identities with *B. rapa*. This suggests that the  
495 insertion of LTR retrotransposon event took place before the generation of *B.*  
496 *napus* as a species. However, only 15.6% of the natural *B. napus* population  
497 was found to contain the LTR insertion, which indicates that the LTR insertion  
498 might be lost in the process of domestication or breeding of rapeseed. As  
499 pod shattering is beneficial to seed release, the loss of LTR insertion is  
500 evolutionarily advantageous. This is further consistent with the theory that  
501 pod shatter resistance was selectively against during natural evolution or  
502 domestication.

503 We thus propose a simple model to explain the *BnSHP1.A9* dependent pod  
504 shatter resistance in *B. napus*. The non-LTR *BnSHP1.A9* (in R1, LTR<sup>-</sup>) is in a  
505 transcriptionally active state. DNA methylation of the LTR insertion in  
506 *BnSHP1.A9* promoter (in R2, LTR<sup>+</sup>) spreads to the transcription initiation



507 region, thus converting *BnSHP1.A9* from an active state to a silenced state.

508 In this study, hypermethylation of the *BnSHP1.A9* promoter region, mainly

509 through CG and CHH methylations, appears to be the major epigenetic

510 factor in the regulation of gene expression. It seems reasonable for plants to

511 evolve such an epigenetic regulatory mechanism to gain functional variation

512 for pod shatter resistance.

### 513 **Application of *BnSHP1.A9* gene for oilseed rape breeding**

514 In this study we investigated the molecular basis of pod shatter resistance in

515 oilseed rape utilizing natural variation in *B. napus* germplasm and showed that

516 a single gene, *BnSHP1.A9*, controls genetic variation for pod shatter resistant

517 at *qSRI.A9.1* locus. Our research provides two gene-specific markers, one co-

518 dominant marker (BnSHP1.A9IF4) detecting sequence difference within the

519 CDS of *BnSHP1.A9*, and the other co-dominant marker (BnSHP1.A9P1/P2)

520 detecting presence/absence variation (PAV) of LTR insertion in *BnSHP1.A9*

521 promoter region. Both markers can be applied for the efficient selection of this

522 QTL for pod shatter resistance in *B. napus* breeding programs starting from

523 early generations. Previously, there were only linked markers available for

524 marker assisted selection for pod shatter resistance in *B. napus* to PSRI QTL

525 reported and could be used for breeding (Raman et al., 2014; Liu et al., 2016).

526 Our two gene-specific markers developed in this study could be used to

527 further improve the resistance potential by introducing the *BnSHP1.A9* (R2)

528 allele with positive effect into lines containing the *BnSHP1.A9* (R1) allele for  
529 genetic improvement. These markers could be easily assayed via  
530 conventional agarose gel electrophoresis and high throughput capillary  
531 electrophoresis platforms. The sources of pod shatter resistance identified  
532 herein can be used for introgression of favorable alleles and enrichment of  
533 alleles in the breeding germplasm.

534 Recently CRISPR-Cas9 genome editing and other genetic transformation  
535 platforms have become available for oilseed rape improvement (Zaman et al.,  
536 2019). Editing IND and ALC genes has improved the pod shatter resistance in  
537 *B. napus* (Braatz et al., 2018a; b). Our results clearly revealed that down-  
538 regulation of *BnSHP1.A9* could increase PSRI. Genome editing can not only  
539 mutate *BnSHP1.A9*, but also other functionally redundant homologous of  
540 *SHP1*, as well as the homologous of *SHP2*. Knockdown the multiple copies of  
541 functional redundant genes or homologues has more effect on phenotypic  
542 variation. However, these approaches are difficult to deploy commercially due  
543 to the legal restrictions on GMO crops in some countries, such as Europe. In  
544 countries that are open to gene edited crops, our finding on the down-  
545 regulation of the *BnSHP1.A9* having a positive effect on pod shatter  
546 resistance can be used to manipulate the gene expression by mutation of this  
547 gene and its homologs for the improvement of pod shatter resistance in *B.*  
548 *napus*.

549 In conclusion, we showed that a *SHP1* paralog, controls pod shatter

550 resistance at qSRI.A9.1 QTL in the DH population from R1/R2 and in a  
551 diversity panel of oilseed rape. Our results suggest that upstream promoter  
552 region of *BnSHP1.A9* controls pod shatter resistance, rather than the coding  
553 sequence. This study provides a novel source of germplasm, gene-specific  
554 markers and insights on molecular basis of *SHP1* mediated resistance to pod  
555 shatter in oilseed rape. These resources will facilitate the genetic  
556 improvement of pod shattering resistance in oilseed rape.

557

558

## 559 **DECLARATIONS**

### 560 **Ethics approval and consent to participate**

561 Not applicable

562

### 563 **Consent for publication**

564 Not applicable

565

### 566 **Competing interests**

567 The authors declare that they have no competing interests.

568

### 569 **Funding**

570 The Natural Science Foundation of China (U19A200404 and 31771842), the

571 National Key Research and Development Program of China

572 (2016YFD0100200, 2018YFE0108000), Research for National Brassica  
573 Germplasm Improvement Program (NBGIP, project DAN00208)–Pod shatter  
574 resistance component funded by the GRDC, Australia, the Science and  
575 Technology Innovation Project of Chinese Academy of Agricultural Sciences  
576 (Group No. 118) and the Earmarked Fund for China Agriculture Research  
577 System (CARS-12) supported this work.

578

#### 579 **Authors' contributions**

580 QH and HR designed the research. JL, RZ, WH, WW, DM and TC performed  
581 genetic analysis and field research. RZ performed genetic transformation  
582 and DNA methylation analysis, JL and RZ analyzed data. YQ and RR  
583 performed SHP1 analysis using capillary electrophoresis, JL wrote the first  
584 version of the manuscript. All authors reviewed the manuscript.

#### 585 **References**

586 Arnaud, N., Girin, T., Sorefan, K., Fuentes, S., Wood, T.A., Lawrenson, T.,  
587 Sablowski, R. and Østergaard, L. (2010) Gibberellins control fruit patterning in  
588 *Arabidopsis thaliana*. *Genes Dev.* **24**, 2127-2132.

589 Braatz, J., Harloff, H.J. and Jung, C. (2018) EMS-induced point mutations  
590 in ALCATRAZ homoeologs increase silique shatter resistance of oilseed rape  
591 (*Brassica napus*). *Euphytica.* **214**, 29.

592 Braatz, J., Harloff, H.J., Emrani, N., Elisha, C., Heepe, L., Gorb, S.N. and  
593 Jung, C. (2018) The effect of INDEHISCENT point mutations on silique shatter  
594 resistance in oilseed rape (*Brassica napus*). *Theor Appl Genet.* **131(4)**, 959-  
595 971.

596 Cao, Y.F., Jiang, Y.R., Ding, M.Q., He, S., Zhang, H., Lin, L.F. and Rong, J.  
597 K. (2015) Molecular characterization of a transcriptionally active Ty1/copia-like  
598 retrotransposon in *Gossypium*. *Plant Cell Rep.* **34(6)**, 1037-1047.

599 Chalhoub, B. et al. (2014) Early allopolyploid evolution in the post-  
600 Neolithic *Brassica napus* oilseed genome. *Science.* **345**, 950–953.

601 Churchill, G.A., Doerge, R.W. (1994) Empirical threshold values for  
602 quantitative trait mapping. *Genetics*, **138**, 963-971.

603 Corpet, F. (1988) Multiple sequence alignment with hierarchical clustering.  
604 *Nucl. Acids Res.* **16(22)**, 10881-10890.

605 Cui, X.K. and Cao, X.F. (2014) Epigenetic regulation and functional  
606 exaptation of transposable elements in higher plants. *Curr Opin in Plant Biol.*  
607 **21**, 83-88.

608 Eichten, S.R., Ellis, N.A., Makarevitch, I., Yeh, C.T., Gent, J.I., Guo, L.,  
609 McGinnis, K.M., Zhang, X., Schnable, P.S., Vaughn, M.W., Dawe, R.K. and  
610 Springer, N.M. (2012) Spreading of heterochromatin is limited to specific  
611 families of maize retrotransposons. *PLoS Genet.* **8(12)**, e1003127.

612 Gruntman, E., Qi, Y.J., Slotkin, R.K., Roeder, T., Martienssen, R.A., and  
613 Kismeth R.S. (2008) Analyzer of plant methylation states through bisulfite  
614 sequencing. *BMC Bioinf.* **9**, 371.

615 Gao, C., Zhou, G., Ma, C., Zhai, W., Zhang, T., Liu, Z., Yang, Y., Wu, M.,  
616 Yue, Y., Duan, Z., Li, Y., Li, B., Li, J., Shen, J., Tu, J. and Fu, T. (2016)  
617 Helitron-like transposons contributed to the mating system transition from out-  
618 crossing to self-fertilizing in polyploid *Brassica napus* L. *Sci Rep.* **6**, 33785.

619 Gent, J.I., Ellis, N.A. Guo, L., Harkess, A.E., Yao, Y., Zhang, X. and Dawe,  
620 R.K. (2013) CHH islands: de novo DNA methylation in near-gene chromatin  
621 regulation in maize. *Genome Res.* **23(4)**, 628-637.

622 Gu, Q., Ferrándiz, C., Yanofsky, M.F. and Martienssen, R. (1998) The

623 *FRUITFULL* MADS-box gene mediates cell differentiation during *Arabidopsis*  
624 fruit development. *Development*, **125**, 1509-1517.

625 Hood, E.E., Gelvin, S.B., Melethers, L.S. and Hoekema, A. (1993) New  
626 *Agrobacterium* helper plasmid for gene transferring to plants. *Transgenic Res.*  
627 **2**, 208-218.

628 Hou, J., Long, Y., Raman, H., Zou, X., Wang, J., Dai, S., Xiao, Q., Li, C.,  
629 Fan, L., Liu, B. and Meng, J. (2012) A Tourist-like MITE insertion in the  
630 upstream region of the *BnFLC.A10* gene is associated with vernalization  
631 requirement in rapeseed (*Brassica napus* L.). *BMC Plant Biol.* **12**, 238.

632 Hu, Z., Hua, W., Huang, S., Yang, H., Zhan, G., Wang, X.F., Liu, G.H. and  
633 Wang, H.Z. (2012) Discovery of pod shatter-resistant associated SNPs by  
634 deep sequencing of a representative library followed by bulk segregant  
635 analysis in oilseed rape. *PLoS ONE.* **7**, e34253.

636 Kadkol, G.P., Burrow, R.P. and Halloran, G.M. (1984) Evaluation of  
637 *Brassica* genotypes for resistance to shatter. I. Development of a laboratory  
638 test. *Euphytica*, **33**, 63-73.

639 Kumar, S., Stecher, G. and Tamura, K. (2016) MEGA7: molecular  
640 evolutionary genetics analysis version 7.0 for bigger datasets. *Mol Biol Evol.*  
641 **33(7)**, 1870-1874.

642 Larsson, E., Roberts, C.J., Claes, A.R., Franks, R.G. and Sundberg, E.  
643 (2014) Polar auxin transport is essential for medial versus lateral tissue  
644 specification and vascular-mediated valve outgrowth in *Arabidopsis gynoecia*.  
645 *Plant Physiol.* **166**, 1998-2012.

646 Li, L.C., and Dahiya, R. (2002) MethPrimer: designing primers for  
647 methylation PCRs. *Bioinformatics.* **18(11)**, 1427-31.

648 Liljegren, S. J., Ditta, G. S., Eshed, Y., Savidge, B., Bowman, J.L. and  
649 Yanofsky, M. F. (2000) SHATTERPROOF MADS-box genes control seed  
650 dispersal in *Arabidopsis*. *Nature*, **404(6779)**, 766-770.

651 Liljegren, S.J., Roeder, A.H., Kempin, S.A., Gremski, K., Ostergaard, L.,  
652 Guimil, S., Reyes, D.K. and Yanofsky, M.F. (2004) Control of fruit patterning in  
653 *Arabidopsis* by INDEHISCENT. *Cell*, **116**, 843-853.

654 Liu, J., Mei, D. S., Li, Y. C., Cui J. C., Wang, H., Peng P. F., Fu, L. and  
655 Hu, Q. (2013) Combining ability and breeding potential of oilseed rape elite  
656 lines for pod shatter resistance. *J. Integr. Agric.* **12**, 552-555.

657 Liu, J., Wang, J., Wang, H., Wang, W.X., Mei, D.S., Zhou, R.J., Cheng,  
658 H.T., Yang, J., Raman, H. and Hu, Q. (2016) Multigenic control of pod  
659 shattering resistance in Chinese oilseed rape germplasm revealed by  
660 genome-wide association and linkage analyses. *Front. Plant Sci.* **7**(1058), 1-  
661 14.

662 Østergaard, L., Kempin, S.A., Bies, D., Klee, H.J. and Yanofsky, M.F.  
663 (2006) Pod shatter-resistant Brassica fruit produced by ectopic expression of  
664 the FRUITFULL gene. *Plant Biotech. J.* **4**, 45-51.

665 Rajani, S. and Sundaresan, V. (2001) The *Arabidopsis* myc/bHLH gene  
666 ALCATRAZ enables cell separation in fruit dehiscence. *Curr. Biol.* **11**, 1914–  
667 1922.

668 Raman, H., Zhang, K., Cakir, M., Appels, R., Garvin, D.F., Maron, L.G.,  
669 Kochian, L.V., Moroni, J.S., Raman, R., Imtiaz, M., Drake-Brockman, F.,  
670 Waters, I., Martin, P., Sasaki, T., Yamamoto, Y., Matsumoto, H., Hebb, D.M.,  
671 Delhaize, E. and Ryan, P.R. (2005) Molecular characterization and mapping of  
672 ALMT1, the aluminium-tolerance gene of bread wheat (*Triticum aestivum* L.).  
673 *Genome.* **48**(5), 781-791.

674 Raman, H., Raman, R., Kilian, A., Detering, F., Carling, J., Coombes, N.,  
675 Diffey, S., Kadkol, G., Edwards, D., McCully, M., Ruperao, P., Parkin, I.A.P.,  
676 Batley, J., Lockett, D.J. and Wratten, N. (2014) Genome-wide delineation of  
677 natural variation for pod shatter resistance in *Brassica napus*. *PLoS ONE*, **9**,  
678 e101673.

679 Raman, R., Qiu, Y., Coombes, N., Song, J., Kilian, A. and Raman, H.

680 (2017) Molecular diversity analysis and genetic mapping of pod shatter  
681 resistance loci in *Brassica carinata* L. *Front Plant Sci.* **8**, 1765.

682 Roeder, A.H., Ferrandiz, C. and Yanofsky, M.F. (2003) The role of the  
683 REPLUMLESS homeodomain protein in patterning the *Arabidopsis* fruit. *Curr.*  
684 *Biol.* **13**, 1630-1635.

685 Salentijn, E.M.J., Pereira, A., Angenent, G.C., van der Linden, C.G.,  
686 Krens, F., Smulders, M.J.M. and Vosman, B. (2007) Plant translational  
687 genomics: from model species to crops. *Mol. Breed.* **20**, 1-13.

688 Song, X.W. and Cao, X.F. (2017) Transposon-mediated epigenetic  
689 regulation contributes to phenotypic diversity and environmental adaptation in  
690 rice. *Curr Opin in Plant Biol.* **36**, 111–118.

691 Shi, L., Song, J., Guo, C., Wang, B., Guan, Z., Yang, P., Chen, X., Zhang,  
692 Q., King, G.J., Wang, J. and Liu, K. (2019) A CACTA-like transposable  
693 element in the upstream region of *BnaA9.CYP78A9* acts as an enhancer to  
694 increase silique length and seed weight in rapeseed. *Plant J.* 98(3), 524-539.

695 Simonini, S., Bencivenga, S., Trick, M. and Østergaard, L. (2017) Auxin-  
696 induced modulation of ETTIN activity orchestrates gene expression in  
697 *Arabidopsis*. *Plant Cell*, **29(8)**, 1040-4651.

698 Stein N., Herren. G. and Keller, B. (2001) A new DNA extraction method  
699 for high-throughput marker analysis in a large genome species such as  
700 *Triticum aestivum*. *Plant Breed* **120**, 354-356.

701 Sun, F. et al. (2017) The high-quality genome of *Brassica napus* cultivar  
702 ‘ZS11’ reveals the introgression history in semi-winter morphotype. *Plant J.* **92**,  
703 452-468.

704 Tamura, K., Stecher, G., Peterson, D., Filipowski, A. and Kumar, S. (2013)  
705 MEGA6: Molecular Evolutionary Genetics Analysis version 6.0. *Mol. Biol.*  
706 *Evol.* **30**, 2725-2729.



707 Wang, R., Ripley, V.L. and Rakow, G. (2007) Pod shatter resistance  
708 evaluation in cultivars and breeding lines of *Brassica napus*, *B. juncea* and  
709 *Sinapis alba*. *Plant Breed.* **126**, 588-595.

710 Wang, S.C., Bastern, J. and Zeng, Z.B. (2006) Windows QTL  
711 Cartographer 2.5. Department of Statistics, North Carolina State University,  
712 Raleigh, NC. (<http://statgen.ncsu.edu/qtlcart/WQTLCart.htm>)

713 Zaman, Q.U., Li C., Cheng, H. and Hu, Q. (2019) Genome editing opens  
714 a new era of genetic improvement in polyploid crops. *The Crop J*, **7**,141-150.

715 Zeng, Z.B. (1994) Precision mapping of quantitative trait loci. *Genetics*,  
716 **136**, 1457-1468.

717 Zhang, B., Liu, C., Wang, Y., Yao, X., Wang, F., Wu, J., King, G.J. and Liu,  
718 K. (2015) Disruption of a CAROTENOID CLEAVAGE DIOXYGENASE 4 gene  
719 converts flower colour from white to yellow in Brassica species. *New Phytol.*  
720 **206(4)**, 1513-1526.

721 Zhao, M., Du, J., Lin, F., Tong, C., Yu, J., Huang, S., Wang, X., Liu, S. and  
722 Ma, J. (2013) Shifts in the evolutionary rate and intensity of purifying selection  
723 between two *Brassica* genomes revealed by analyses of orthologous  
724 transposons and relics of a whole genome triplication. *Plant J.* **76(2)**:211-22.

725 Zuniga-Mayo, V.M., Reyes-Olalde, J.I., Marsch-Martinez, N. and de Folter,  
726 S. (2014) Cytokinin treatments affect the apical-basal patterning of the  
727 Arabidopsis gynoecium and resemble the effects of polar auxin transport  
728 inhibition. *Front. Plant Sci.* **5**, 191.

729

1 **Table 1. Primer pairs used for *BnSHP1.A9* gene cloning and genetic analyses**

| Primer name | Amplification objective | Forward/Reverse (5'-3')     |        | m  | Products length (bp) |
|-------------|-------------------------|-----------------------------|--------|----|----------------------|
|             |                         | F                           | R      |    |                      |
| BnSHP1.A9g  | Genetic analysis        | F:<br>AGAAGTGTCTGAAATCAAA   | GTGGTA | 57 | R1: 1928             |
|             |                         | R:<br>CCTTA ACTATGAATAAGAAT | GTCGC  | 57 | R2: 1953             |
| BnSHP1.A9p1 | Promoter of R1          | F:<br>CCGAGTCCCACGCAAATA    | G      | 59 | R1: 2264             |
|             |                         | R:<br>CGGCCACGAGTGAAAAG     | AT     | 61 |                      |
| BnSHP1.A9p2 | Promoter of R2          | F:<br>TCATTGAAAACGCCGAAGG   | GTT    | 61 | R2: 6122             |
|             |                         | R:<br>AGCATACCTGTTGCTGGCG   |        | 62 |                      |

|     |              | T                   |    |         |
|-----|--------------|---------------------|----|---------|
| IF4 | InDel marker | F:                  |    |         |
|     | analysis     | ACTTGGGACATAGCCTAAT | 58 | R1: 267 |
|     |              | GATG                |    |         |
|     |              | R:                  |    |         |
|     |              | TCGTACCACTTTGATTTCA | 58 | R2: 290 |
|     |              | GACA                |    |         |

2  
3  
4  
5  
6  
7  
8  
9  
10  
11  
12  
13  
14  
15  
16  
17  
18

19 **Table 2. QTL associated with pod shatter resistance in a doubled haploid**  
 20 **population from R1 (pod shatter resistant)/R2 (pod shatter susceptible). DH lines**  
 21 **were evaluated for resistance using random impact test. R<sup>2</sup> refers to phenotypic**  
 22 **variance explained**

| QTL   | Year | Confident Interval<br>(cM) | LOD score | R2 (%) | Additive Effect<br>(parental<br>allele) |
|-------|------|----------------------------|-----------|--------|-----------------------------------------|
| <hr/> |      |                            |           |        |                                         |

|          |      |             |       |       |            |
|----------|------|-------------|-------|-------|------------|
| qSRI.A9. |      |             |       |       |            |
| 1        | 2013 | 86.5-93.2   | 4.91  | 11.26 | -0.07 (R2) |
|          | 2014 | 88.1-96.6   | 4.76  | 12.07 | -0.15 (R2) |
| qSRI.A9. |      |             |       |       |            |
| 2        | 2013 | 109.6-113.5 | 13.43 | 38.11 | 0.12 (R1)  |
|          | 2014 | 109.0-112.1 | 10.32 | 27.58 | 0.23 (R1)  |

---

23

24

25

26 **Figure legend**

27

28 **Figure 1. Genetic mapping of the QTL; qSRI.A9.1 and underlying the candidate**  
29 **SHATTERPROOF1**paralog of *A. thaliana* in *B. napus*, BnSHP1.A09. **A. The**  
30 **schematic diagram of the LOD curve for the QTL of pod SRI of the A9 linkage**  
31 **group.** The abscissa coordinates represent to the genetic linkage group, and the  
32 ordinate represents to the LOD value. **B. Partial linkage map of chromosome A09,**  
33 **illustrating of the genetic position (cM) of *BnSHP1.A9* locus underlying**  
34 **qSRI.A9.1 for pod shatter in R1/R2 mapping population.** The left indicates the tag  
35 name (the newly developed Indel marker and SSR markers) and corresponding  
36 genetic map on the linkage group, corresponding to the location of the  
37 corresponding QTL for the pod SRI. **C. The structural variations present in the**  
38 ***BnSHP1.A9* gene between the parental lines of the DH mapping population R1**  
39 **and R2. QTL was mapped using gene specific InDEL markers.**

40

41 **Figure 2. Pod shatter resistance index (PSRI) of different transgenic plants (T1)**  
42 **and two parental lines. PSRI was assessed with random impact test and 20**  
43 **Pods/each line were assessed with two replications. Standard deviation of**  
44 **each line is also shown.**

45

46 **Figure 3. Histological analysis of 30-DAP silique cross-sections of**  
47 **35S:*BnSHP1.A9* transgenic rapeseed oil lines.**

48 **(A and B)** Microscopy observations of cross-sections of R1 siliques. Bars, 200  $\mu$ m and 40  
49  $\mu$ m. **(C and D)** Microscopy observations of cross-sections of 35S:BnSHP1.A9 transgenic  
50 rapeseed oil siliques. Scale bars, 200  $\mu$ m and 40  $\mu$ m.

51

52 **Figure 4. Expression status of *BnSHP1.A9* correlates with LTR retrotransposon**  
53 **insertion in parents and DH lines. A, *BnSHP1.A9* expression analysis of different**  
54 **tissues and silique, taken at different developmental stages of R1 and R2. *BnActin***  
55 **gene was used as an internal control for relative expression analysis. 1: Root; 2:**  
56 **Stem; 3: Leaf; 4: Bud; 5: Flower; 6: 10d silique; 7: 20d silique; 8: 30d silique; 9: 40d**  
57 **silique. B, *BnSHP1.A9* expression status in DH56 and DH82 lines. 1: 10d silique; 2:**

58 20d silique; 3: 20d silique. **C:** Genotyping of R1, R2, DH56 and DH82 with specific  
59 promoter primers of proR1, proR2 and InDel marker of *BnSHP1.A9*.

60

61 **Figure 5. Cross validation of DNA methylation status of *BnSHP1.A9* in**  
62 **R1/R2 silique genomic DNA.**

63 **A,** amplified fragments illustrated in *BnSHP1.A9* DNA from R1/R2

64 **B, D:** chop-PCR with *BnSHP1.A9* gDNA template and McrBC digested gDNA of 20 DAF  
65 silique from R1 without McrBC digestion; a1: -2412/-1542, a2: -1616/-882, a3: -902/-30,  
66 a4: -49/+1413, a5: +1034/+2007

67 **C, E:** chop-PCR with *BnSHP1.A9* gDNA template and McrBC digested gDNA of 20 DAF  
68 silique from R2. b1: -7412/-6823, b2: -6753/-5765, b3: -3191/-2285, b4: -2538/-1788, b5:  
69 -1707/-1027, b6: -1035/-102, b7: -49/+436, b8: +1035/+2012, b9: +1883/+2793

70 M: Trans 2k plus.

71

72 **Figure 6. Methylation analysis of upstream promoter region of the**  
73 ***BnSHP1.A9* comparison between R1 and R2**

74 **A** The positions of BSP analysis in the upper 5' UTR region of *BnSHP1.A9* (black line) and  
75 4803 bp *copia* LTR-retrotransposon insertion (red box) are illustrated. Red lines indicate  
76 the position of the bisulphite sequencing (BSP) analyses.

77 **B** Methylation of cytosine residues in CG, CHG and CHH sites (purple, green and blue  
78 lines, respectively) was revealed by bisulphite sequencing of the four BSP regions.

79 **C** Methylation data of cytosine residues in CG, CHG and CHH sites from the four BSP  
80 regions

81

82 **Figure 7. The distribution of *BnSHP1.A9* promoter allele in natural population**  
83 **and corresponding PSRI in 2012 and 2013 environments.**

84

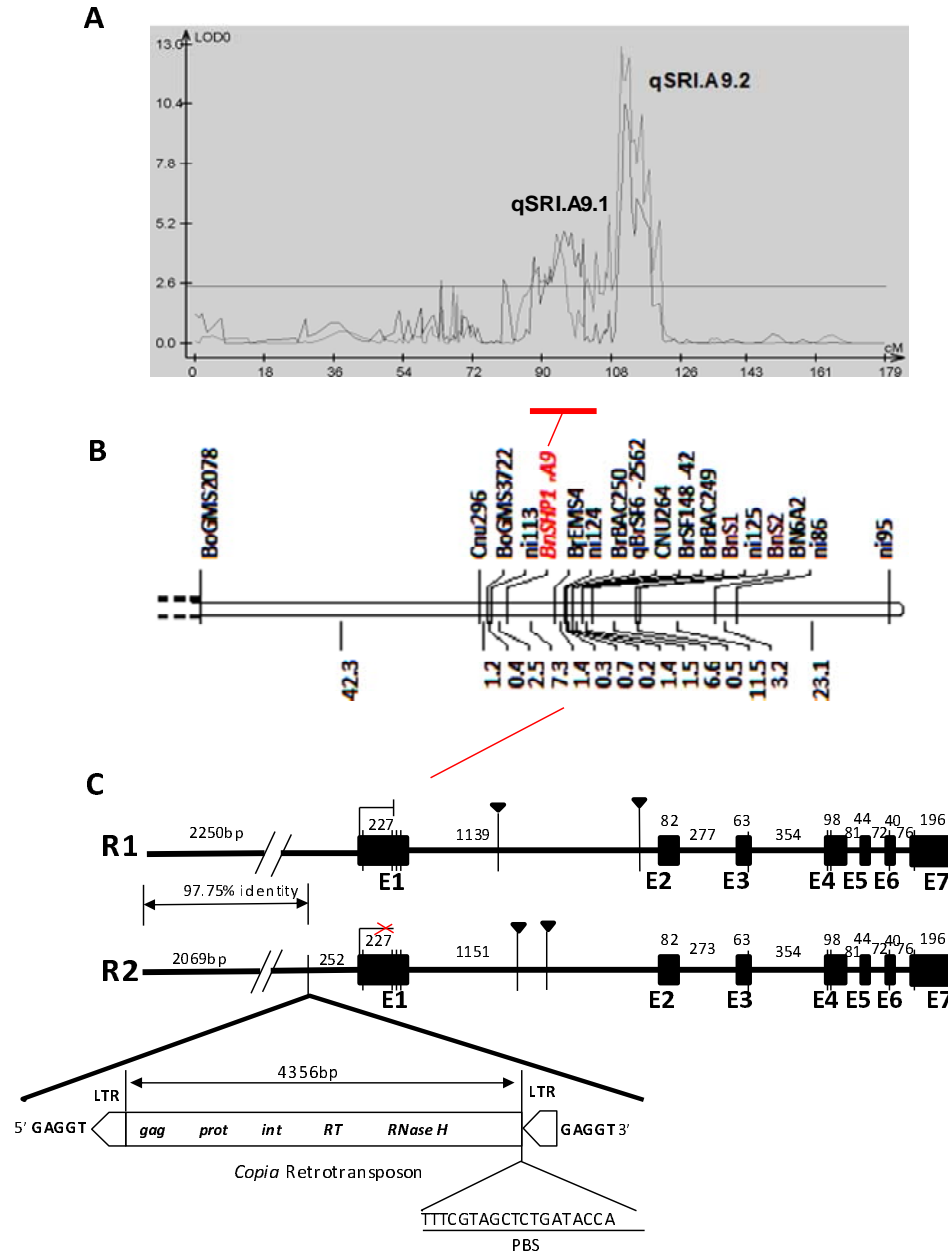

Fig. 1.

85

86

87

88  
89  
90  
91

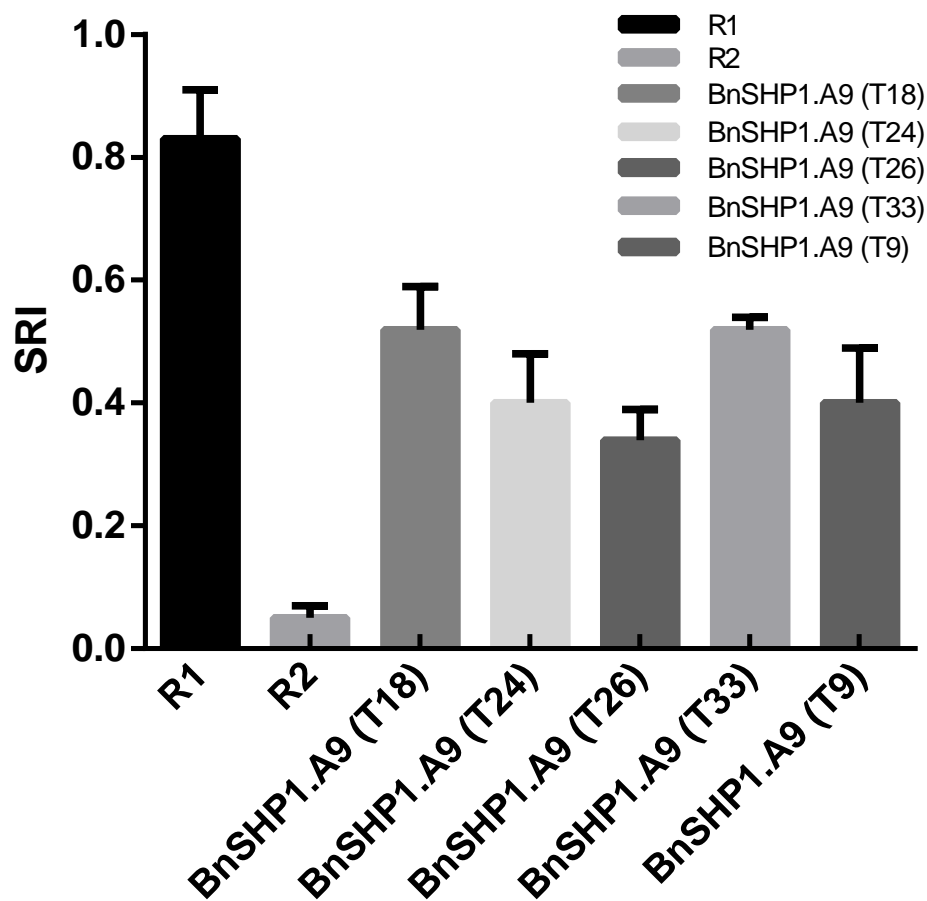

92  
93  
94  
95  
96  
97  
98  
99  
100  
101  
102  
103  
104  
105  
106

Fig. 2.



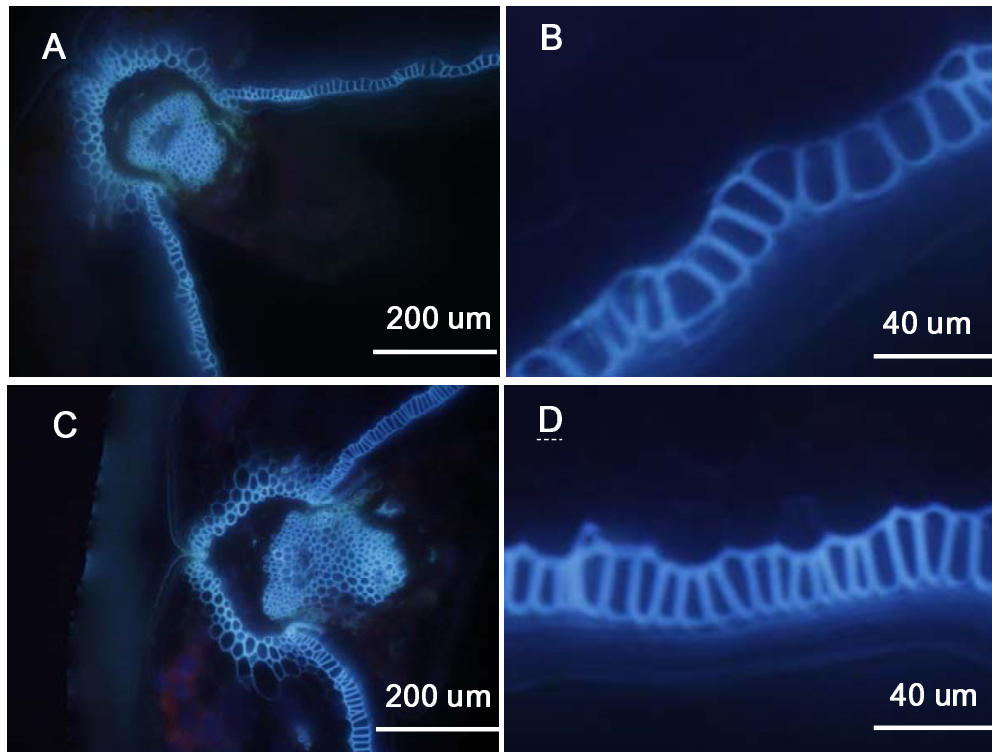

107  
108  
109  
110  
111  
112  
113  
114  
115  
116  
117  
118  
119  
120  
121

**Fig. 3.**

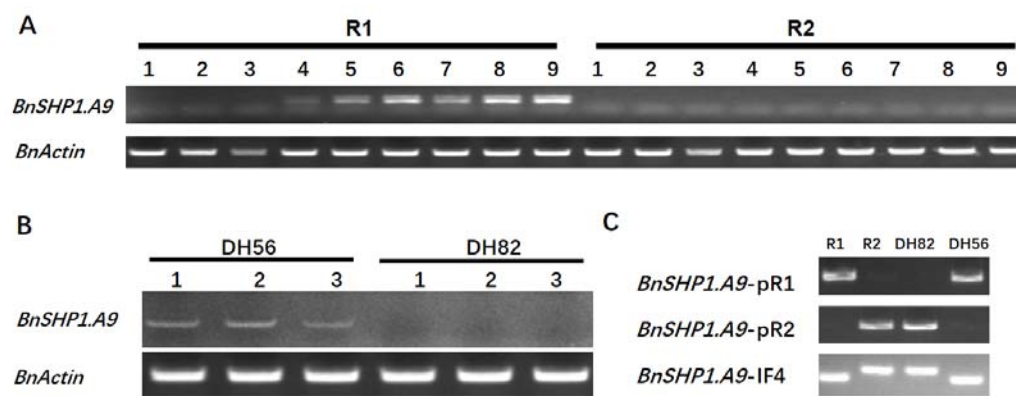

122

123

124

125

**Fig. 4.**

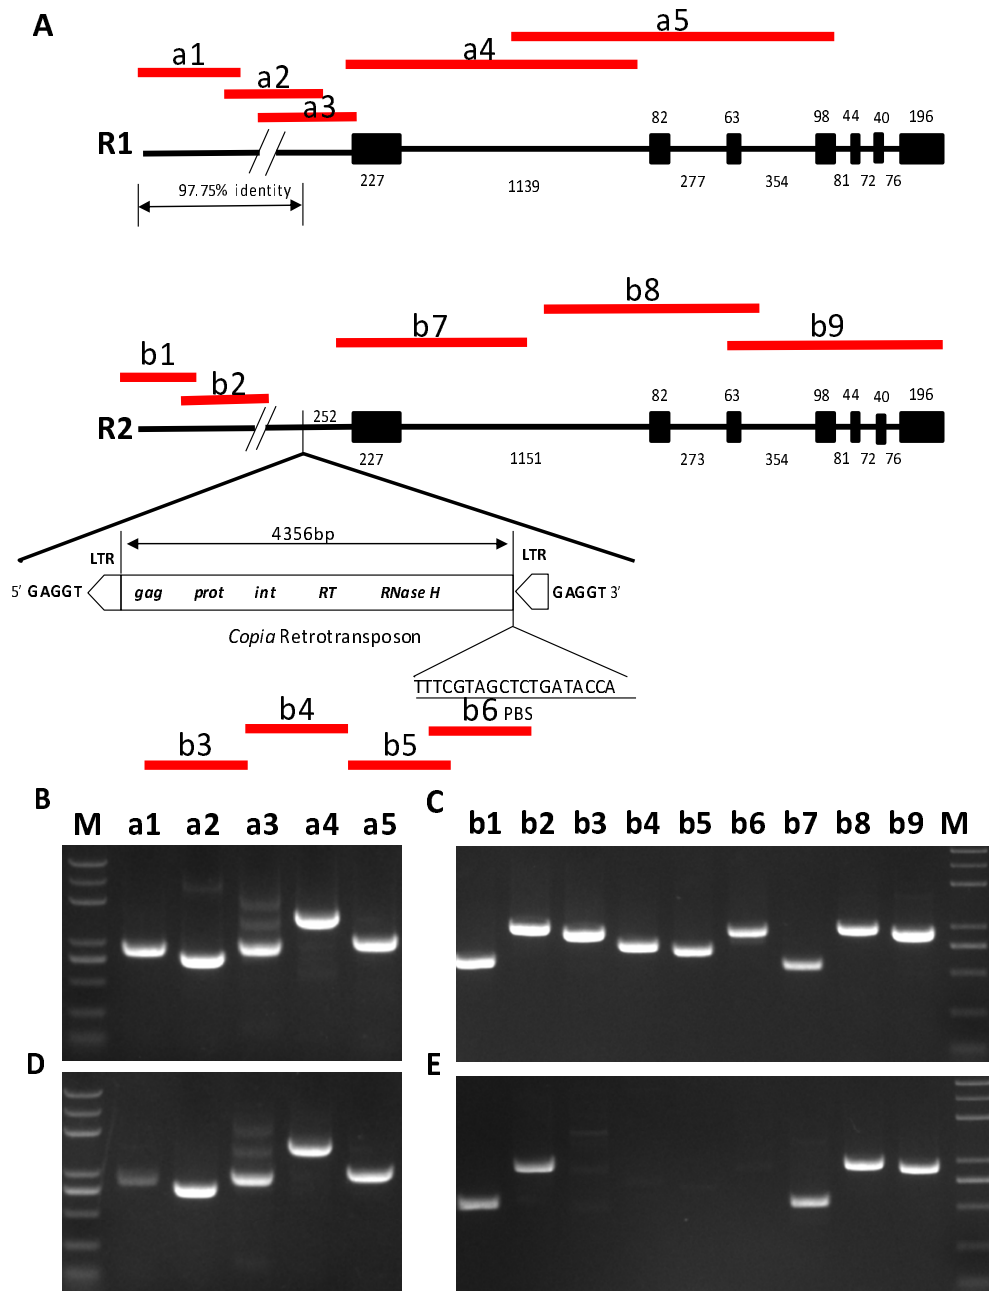

**Fig. 5.**

126  
127  
128  
129  
130  
131  
132  
133  
134  
135  
136

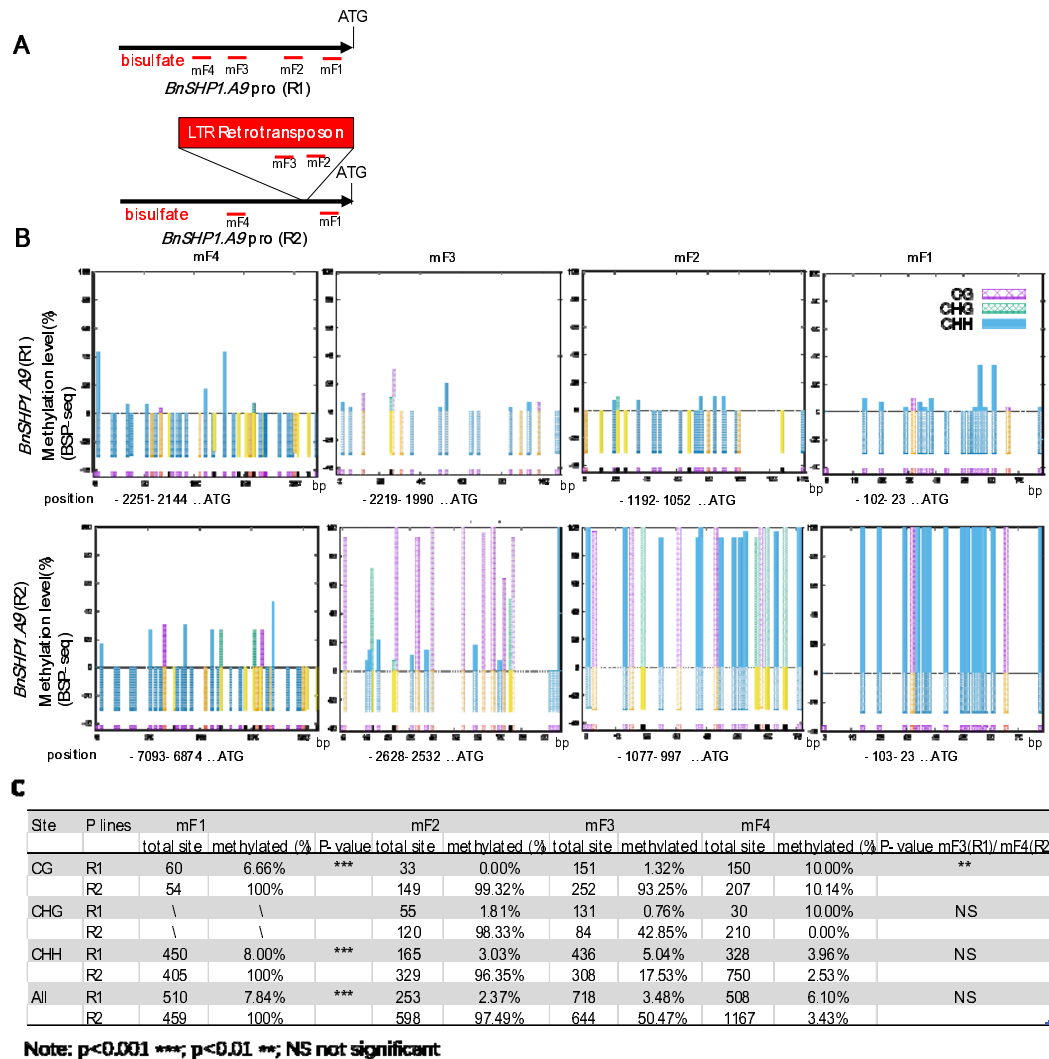

Fig. 6.

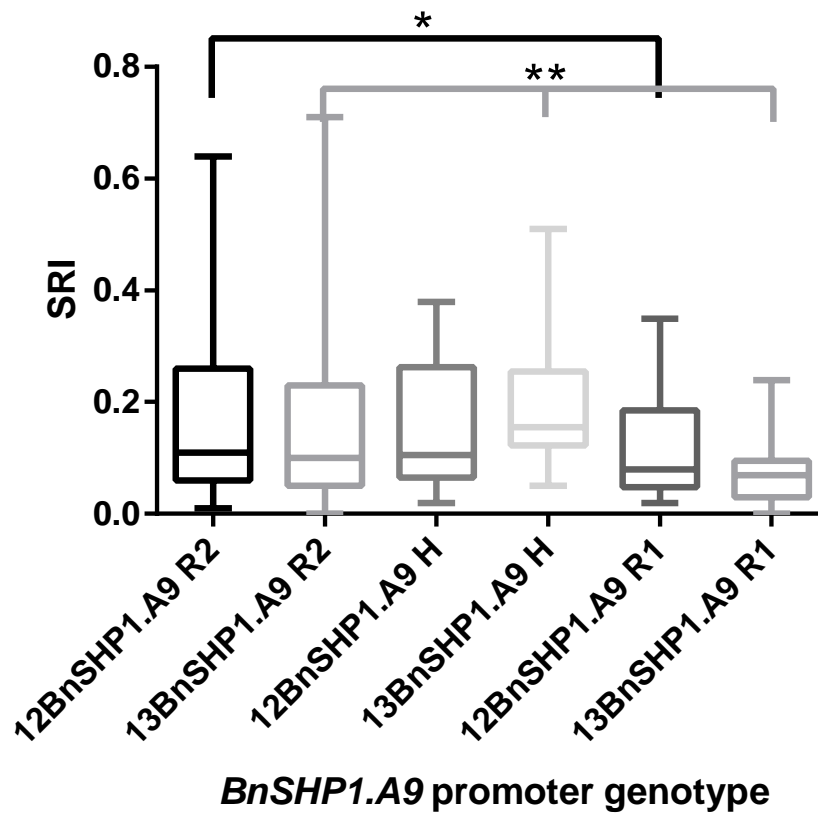

Fig. 7.
